# Supplementary material for: A virus‐induced gene‐silencing system for functional genetics in a betalainic species, Amaranthus tricolor (Amaranthaceae)
Source: PubMed Central journal article supplement (PMC6384298; doi:10.1002/aps3.1221), 2019-02-07

**APPENDIX S1.** Plasmids used in virus-induced gene silencing (VIGS) experiments in *Amaranthus tricolor*. pTRV2 is as described in Senthil-Kumar and Mysore (2014).

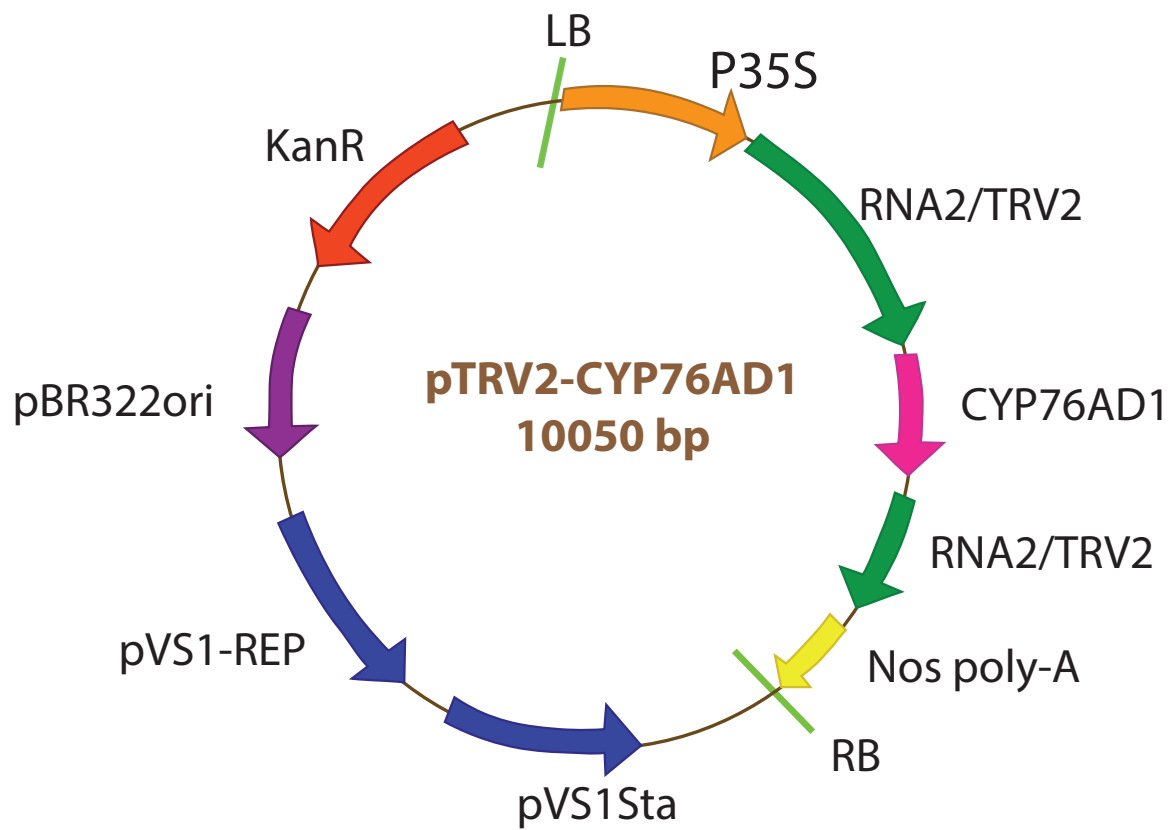

Supplement: APS3-7-e01221-s001.pdf [file APS3-7-e01221-s001.pdf]
