# Supplementary material for: A virus‐induced gene‐silencing system for functional genetics in a betalainic species, Amaranthus tricolor (Amaranthaceae)
Source: PubMed Central journal article supplement (PMC6384298; doi:10.1002/aps3.1221), 2019-02-07
Supplement: APS3-7-e01221-s003.pdf [file APS3-7-e01221-s003.pdf]

## APPENDIX S3. Detailed description of L-DOPA isolation and quantification method.

### Preparation of samples

Previously described and validated analytical methods were adapted for isolation and quantification of L-DOPA (Saremba et al., 2017). In brief, a 50-mg leaf tissue sample was homogenized (Kontes Pellet Pestle disposable tissue grinder; Thermo Fisher Scientific, Waltham, Massachusetts, USA) in a dark room with a red light in 200  $\mu$ L of 80 : 20 (v/v) methanol : 0.1 N trichloroacetic acid (TCA). Samples were transferred into a centrifuge filter tube (0.2  $\mu$ m, Ultrafree-MC filtered centrifuge tubes; MilliporeSigma, Burlington, Massachusetts, USA) and centrifuged for 3 min at 16,000 g. The supernatant was transferred into a glass insert in a glass amber autosampler vial for chromatography. L-DOPA was quantified in a 10- $\mu$ L injection of each sample.

### Preparation of standards

The L-DOPA standard (Sigma-Aldrich Canada, Oakville, Ontario, Canada) was prepared in the previously described dark conditions. In brief, a 2.5- $\mu$ mol/mL stock solution (L0) of L-DOPA was diluted in series to create a 6-point calibration curve with a range of 19256.63–616212.19 pg on column after a 10- $\mu$ L injection. An initial 1 : 4 dilution was made in Eppendorf tubes (Eppendorf, Hamburg, Germany) by taking 25  $\mu$ L of L0 and diluted in 75  $\mu$ L of 80% methanol (MeOH) in 0.1 N TCA, which resulted in L2. L2 was then vortexed and 50  $\mu$ L was taken and mixed with 50  $\mu$ L of the 80 : 20 (v/v) MeOH : 0.1 N TCA solution, which resulted in L3. A dilution series was produced following the same 1/2 dilutions until the desired concentration of L10 was obtained. The remaining 75  $\mu$ L of each standard was transferred to a conical glass insert in an amber autosampler vial. The precision of L-DOPA retention on column was 0.28% relative standard deviation.

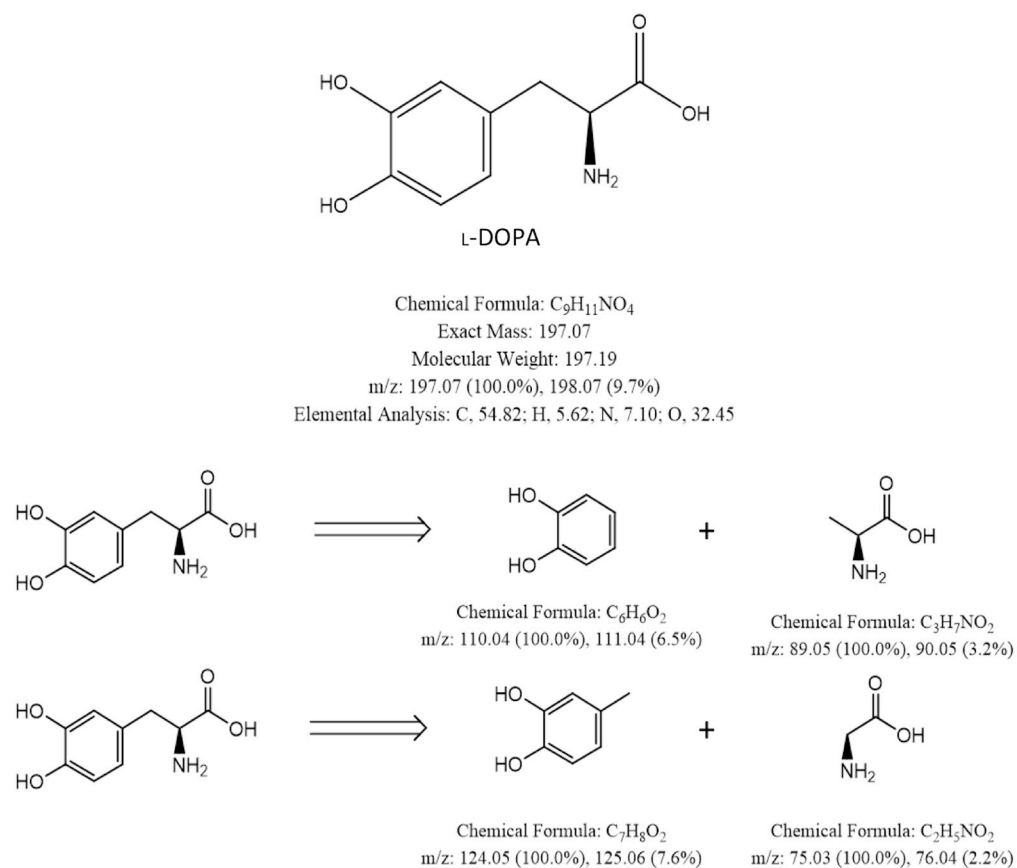

FIGURE S3-1. Predicted fragmentation of L-DOPA by ChemDraw.

### Chromatographic separation of analytes

All samples were separated on a reverse phase column ( $30 \times 3$  mm,  $2.6 \mu\text{m}$  C18 100 Å; Phenomenex, Torrance, California, USA) using Waters Acquity I-Class Ultra-performance liquid chromatography (UPLC; Waters Inc., Mississauga, Ontario, Canada). The column temperature was set to  $30^\circ\text{C}$ . Mobile phase A was 0.1% formic acid (Sigma-Aldrich Canada) in e-pure water. Mobile phase B was 100% acetonitrile. With a flow rate of 0.3 mL/min and an eluent mixing curve of 6, the gradient used was: 0:00 min, 10% B; 0.50 min, 10% B; 3.50 min, 60% B; 4.20 min, 95% B; 5.20 min, 95% B; 7:00 min, 10% B. The entire flow rate was sent to the mass spectrometer for the duration of the run. The method was selective for L-DOPA, and baseline separation was achieved. A 90% acetonitrile in e-pure water solution was used for all of the wash solvents for the instrument for this method.

### Mass spectrometry detection

A Xevo TQ-S Quadrupole mass spectrometer (Waters Inc.) was used for detection and quantification, with electrospray ionization (ESI) in ES+ mode. The capillary voltage was 3.50 kV and the cone voltage was 55.00 V with an offset of 30.0 V. The source temperature was set to  $150^\circ\text{C}$  with a desolvation temperature of  $550^\circ\text{C}$ . Nitrogen was used as the cone gas and desolvation gas with a flow rate of 150 L/h and 800 L/h, respectively; and argon gas was used for the collision cell with a flow rate of 0.15 mL/min. The nebulizer gas flow was set to 7.00 bar. Conditions for multiple reactions monitoring of ion transitions were optimized with MassLynx version 4.1 (Waters Inc.).

### Determination of fragmentation pattern

Fragmentation transitions predicted by ChemDraw (PerkinElmer, Waltham, Massachusetts, USA) included 197.19 m/z to 124.05 m/z, 197.19 m/z to 110.04 m/z, 197.19 m/z to 89.05 m/z, and 197.19 m/z to 75.03 m/z (Fig. S3-1, S3-2). Detection conditions were optimized for the potential fragments.

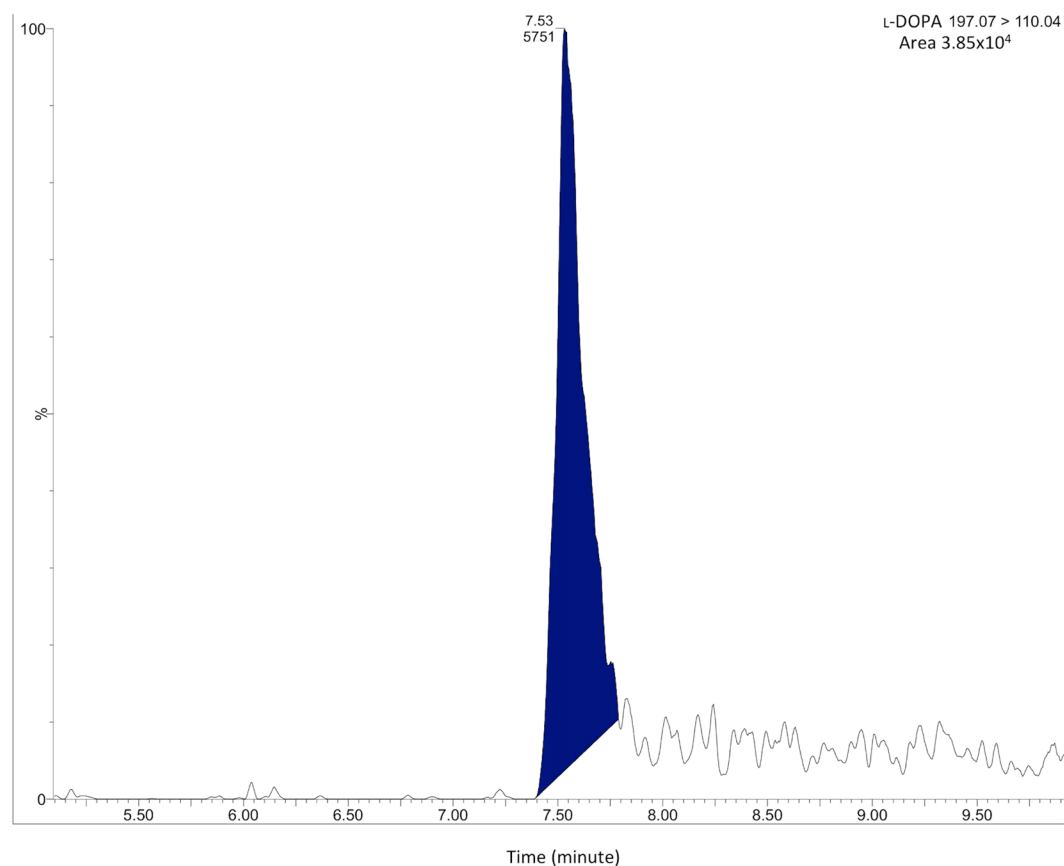

**FIGURE S3-2.** Separation and quantification of the L-DOPA peak by the 197.07 m/z to 110.04 m/z transition.

DOI

A direct infusion of standards was used to determine response and fragmentation parameters. The data were acquired over 10 s during the infusion to collect the peak area of the total ion count to determine relative responses. For the fragmentation transitions of 197.19 m/z to 124.05 m/z, the cone voltage was first optimized increasing in increments of 5 V from 10 V up to 120 V, while the collision was held at 1 V. The collision was then tested in intervals of 5 from 1 to 70 V, which shortened the range, allowing the collision to run from 1–10, optimized at 2 V. The same procedure was followed for the 197.19 m/z to 75.03 m/z transition, where the cone voltage was optimized at 60 V, while the collision was held at 1 V, and following the collision was optimized to 2 V. The 197.19 m/z to 110.04 m/z cone voltage was tested in intervals, and optimized to 115 V, while the collision was determined to be 5 V. For the 197.19 m/z to 89.05 m/z fragmentation transition, the cone voltage was determined to be optimized at 95 V, and a collision of 4 V. The capillary voltage of 3.5 kV was previously optimized for the other compounds detected in the existing method. The fragmentation 197.19 m/z to 110.04 m/z was selected based on the signal-to-noise ratio in repeated standard injections. A summary of the mass spectrometer parameters used is given in Table S3-1.

**TABLE S3-1.** Mass spectrometer parameters.

| Compound | Parent ion (m/z) | Daughter ion (m/z) | Dwell time (s) | Cone (V) | Collision cell (eV) | Delay time(s) |
|----------|------------------|--------------------|----------------|----------|---------------------|---------------|
| L-DOPA   | 197.07           | 75.03              | 0.014          | 60.00    | 2.00                | -1.000        |
| L-DOPA   | 197.07           | 89.05              | 0.014          | 95.00    | 4.00                | -1.000        |
| L-DOPA   | 197.07           | 110.04             | 0.014          | 110.00   | 5.00                | -1.000        |
| L-DOPA   | 197.07           | 124.05             | 0.014          | 15.00    | 2.00                | -1.000        |

### Method validation

The limits of detection and limits of quantification were determined by replicate analysis of standards. The linear range was 0.6–2500 ng on column (Fig. S3-3A). The lower limit of detection was 77 ng on column (Fig. S3-3B).

### Data acquisition and processing

Data were acquired by MassLynx version 4.1, processed using TargetLynx version 4.1 (Waters Inc.) and exported to Excel.

### LITERATURE CITED

Saremba, B. M., F. J. M. Tymm, K. Baethke, M. R. Rheault, M. Sherif, P. K. Saxena, S. J. Murch, et al. 2017. Plant signals during beetle (*Scolytus multistriatus*) feeding in American elm (*Ulmus americana* Planch.). *Plant Signaling and Behavior* 12: 1–11.

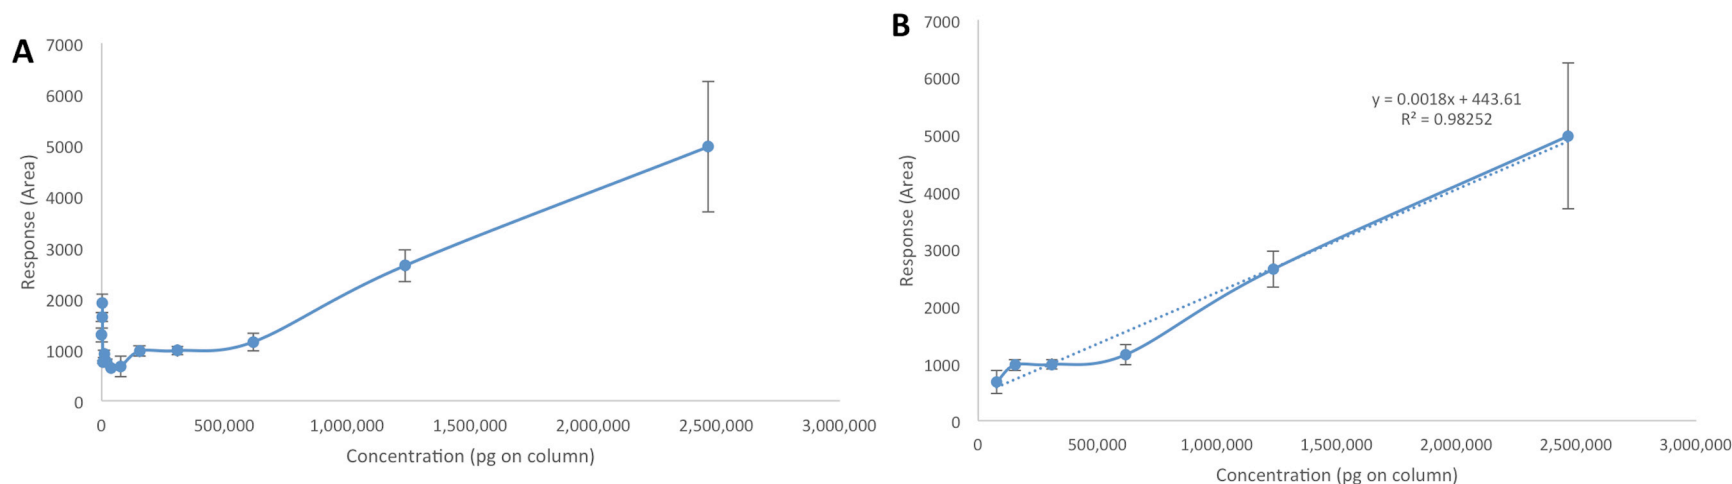

**FIGURE S3-3.** Determination of linearity, limits of detection, and limits of quantification by repeated injections of standards across a dilution series from 0.6–2500 ng on column, showing the full range of standards (A) and the linear range (B). Note: At the lowest concentration of the full range of standards, the instrument noise is greater than the L-DOPA signal.
